# Supplementary material for: Pseudomonas fluorescens SBW25 produces furanomycin, a non-proteinogenic amino acid with selective antimicrobial properties
Source: PubMed Central journal article supplement (PMC3662646; doi:10.1186/1471-2180-13-111), 2013-05-20
Supplement: 1471-2180-13-111-S3.pdf [file 1471-2180-13-111-S3.pdf]

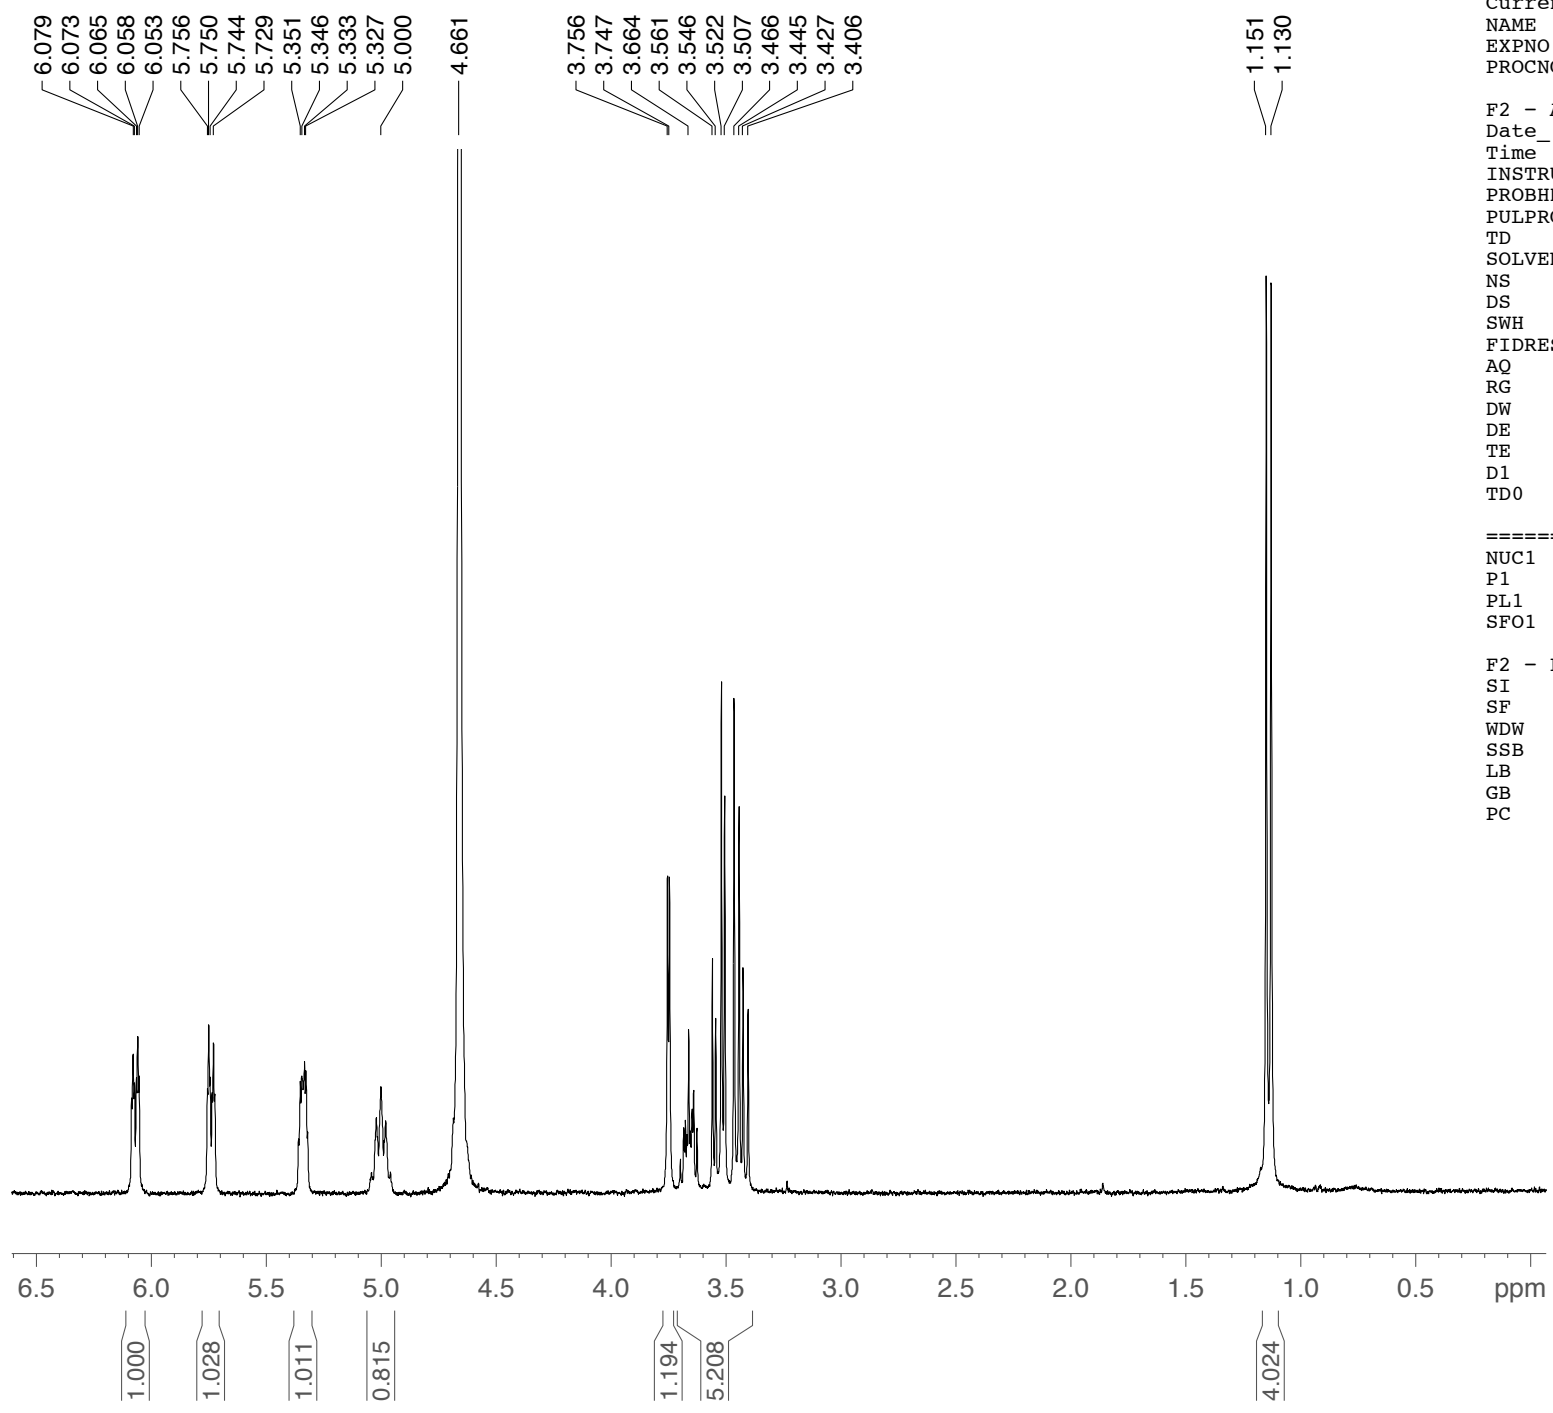

Current Data Parameters  
 NAME DAXV47\_SBW25  
 EXPNO 1  
 PROCNO 1

F2 - Acquisition Parameters  
 Date\_ 20110924  
 Time 11.26  
 INSTRUM DRX300  
 PROBHD 5 mm BBO BB-1H  
 PULPROG zg30  
 TD 65536  
 SOLVENT D2O  
 NS 32  
 DS 4  
 SWH 5387.931 Hz  
 FIDRES 0.082213 Hz  
 AQ 6.0817909 sec  
 RG 812.7  
 DW 92.800 usec  
 DE 158.64 usec  
 TE 298.1 K  
 D1 1.60000002 sec  
 TD0 1

==== CHANNEL f1 =====  
 NUC1 1H  
 P1 11.45 usec  
 PL1 0.00 dB  
 SFO1 300.1319508 MHz

F2 - Processing parameters  
 SI 32768  
 SF 300.1300105 MHz  
 WDW EM  
 SSB 0  
 LB 0.30 Hz  
 GB 0  
 PC 1.00
