# Supplementary material for: Pseudomonas fluorescens SBW25 produces furanomycin, a non-proteinogenic amino acid with selective antimicrobial properties
Source: PubMed Central journal article supplement (PMC3662646; doi:10.1186/1471-2180-13-111), 2013-05-20

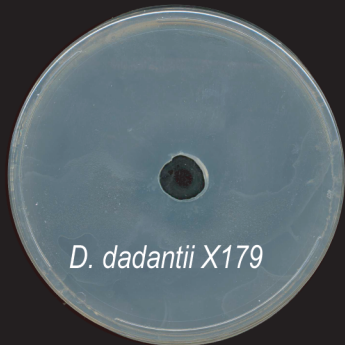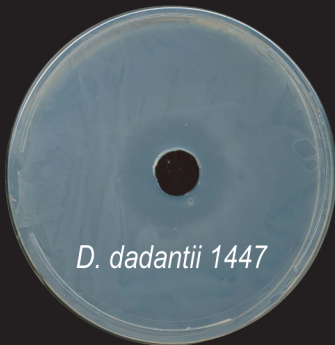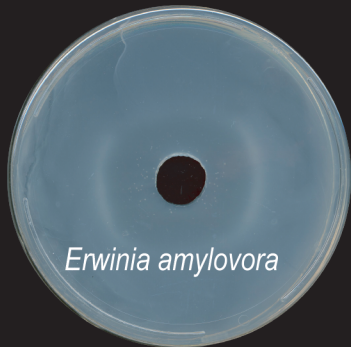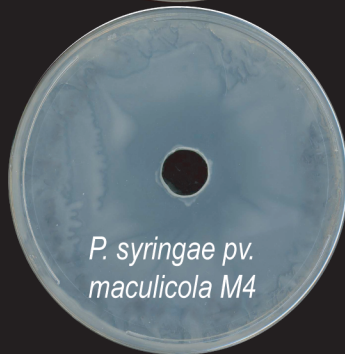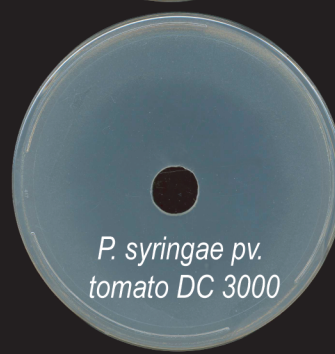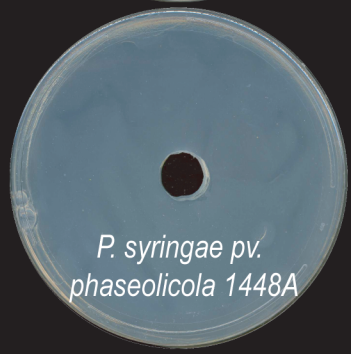

Supplement: 1471-2180-13-111-S5.pdf [file 1471-2180-13-111-S5.pdf]
